# Supplementary material for: Setting Safe Operation Conditions for Acetyl Chloride Hydrolysis through Dynamic Modelling and Bifurcation Analysis
Source: Hindawi journal article supplement (doi:10.1155/2023/9685811), 2023-11-18
Supplement: f1 [file 9685811.f1.docx]

**Setting Safe Operation Conditions for Acetyl Chloride Hydrolysis through Dynamic Modelling and Bifurcation Analysis**

Juan Carlos Ojeda Toro1,†, Izabela Dobrosz-Gómez2, Miguel Ángel Gómez García1

1 Laboratorio de Materiales y Procesos Reactivos, LM&PR. Grupo de Investigación en Procesos Reactivos Intensificados y Materiales Avanzados, PRISMA. Departamento de Ingeniería Química, Facultad de Ingeniería y Arquitectura, Universidad Nacional de Colombia, Sede Manizales.
2 Laboratorio de Materiales y Procesos Reactivos, LM&PR. Grupo de Investigación en Procesos Reactivos Intensificados y Materiales Avanzados, PRISMA. Departamento de Física y Química, Facultad de Ciencias Exactas y Naturales, Universidad Nacional de Colombia, Sede Manizales.

†Actual address: Grupo de Investigación de Aprovechamiento Tecnológico de Materiales y Energía – GIATME. Unidad de Ciencias Básicas, Facultad de Ingeniería. Universidad ECCI. Medellín, Colombia

Correspondence should be addressed to Miguel-Ángel Gómez-García; [magomez@unal.edu.co](mailto:magomez@unal.edu.co);
ORCID: 0000-0002-6415-8515

**Supplementary Material**

**Fig. S1.** Conversion and temperature dynamic behavior of the acetyl chloride hydrolysis. (a and b) ΘB and (c and d) θf. The other parameters values are maintained constant as in Table 1.

**Fig. S2.** Multiparameter continuation diagrams showing the critical points. (a) θf−ΘB and (b) ψ−θf. The other parameters values are maintained constant as in Table 1.

| (a) | (b) |
| --- | --- |
| (c) | (d) |

**Fig. S1.** Conversion and temperature dynamic behavior of the acetyl chloride hydrolysis. (a and b) ΘB and (c and d) θf. The other parameters values are maintained constant as in Table 1.

| (a) | (b) |
| --- | --- |

**Fig. S2.** Multiparameter continuation diagrams showing the critical points. (a) θf−ΘB and (b) ψ−θf. The other parameters values are maintained constant as in Table 1.
